# Supplementary material
Source: Springer Nature journal article supplement (https://www.springermedizin.de/resource/supplementary/12943_2007_361_MOESM9_ESM.pdf/9554012)

Belinostat

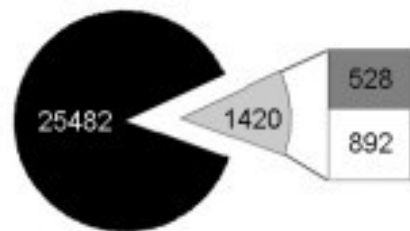

Valproic Acid

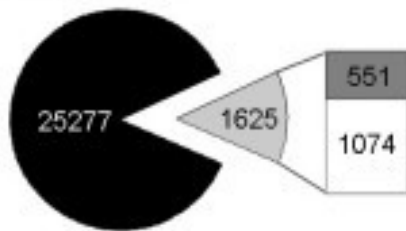

## Legend:

- Not-regulated
- Down-regulated
- Regulated
- Up-regulated

HDAC1 KD

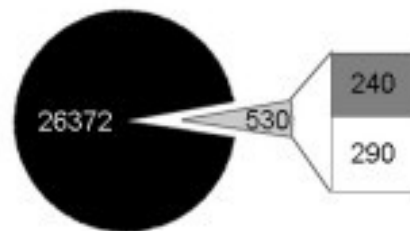

HDAC2 KD

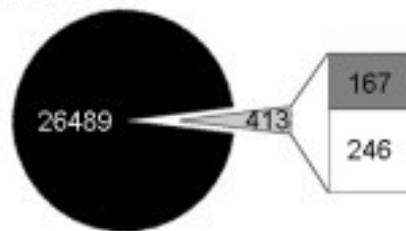

HDAC3 KD

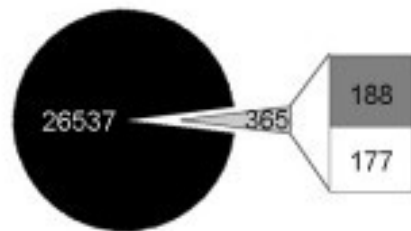

Supplement: MOESM9 [file 9554012]
